# Supplementary material for: Pressure-induced changes in the electronic structure and enhancement of the thermoelectric performance of SnS2: a first principles study
Source: Royal Society of Chemistry journal article supplement (doi:10.1039/c7ra06455a), 2017-01-01
Supplement: c7ra06455a1.pdf [file c7ra06455a1.pdf]

## Electronic Supplementary Information

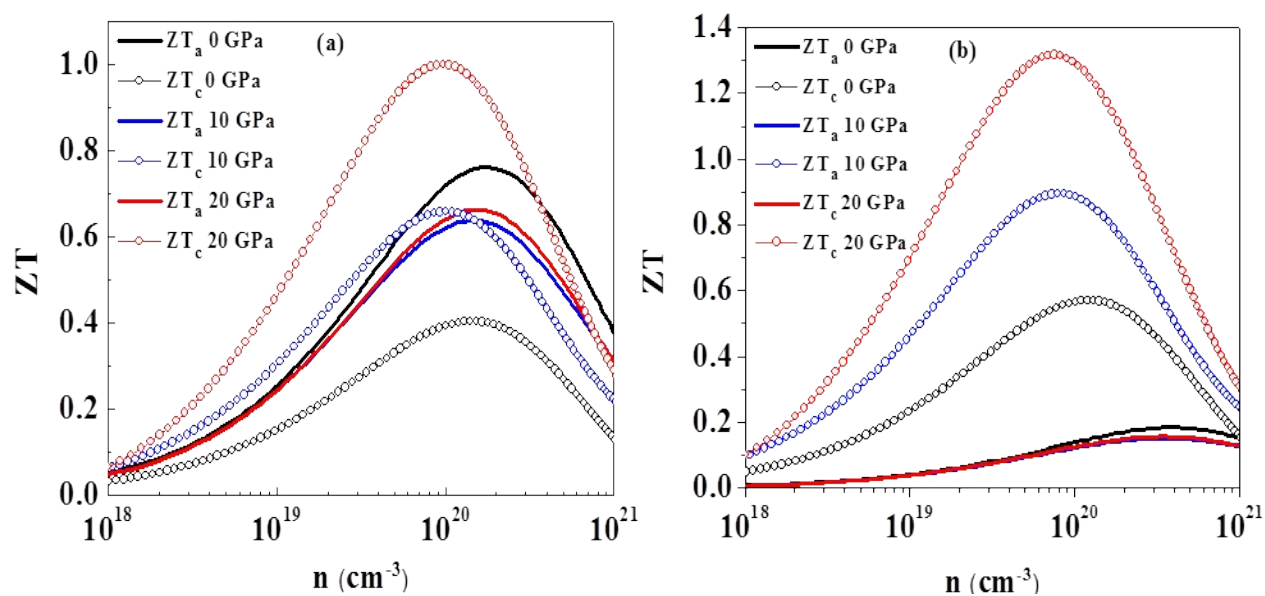

**Figure S1** Figure of merit (ZT) studied in  $a$  and  $c$  directions at 800 K at 0 GPa, 10 GPa and 20 GPa;  $\kappa_l$  values taken from (a) Reference (3) (b) Reference (74)
